# Supplementary material for: Reliability Associated with the Measurement of Continuous Variables in Veterinary Medicine: What the Different Possible Indicators Tell, and How to Use and Report Them
Source: MDPI journal article supplement (doi:10.3390/ani13172793), 2023-09-02
Supplement: s1 [file s1]

# Reliability Associated with the Measurement of Continuous Variables in Veterinary Medicine: What the Different Possible Indicators Tell, and How to Use and Report Them

Sébastien Buczinski

Département des Sciences Cliniques, Faculté de Médecine Vétérinaire, Université de Montréal,  
St-Hyacinthe, QC J2S 2M2, Canada; s.buczinski@umontreal.ca; Tel.: +1-450-773-8521 (ext. 8675)

## Contents

|                                                                                              |   |
|----------------------------------------------------------------------------------------------|---|
| A. DATASET USED FOR ILLUSTRATION PURPOSE: FEEDLOT LUNG CONSOLIDATION DEPTH BY 2 RATERS       | 2 |
| B. PEARSON AND SPEARMAN CORRELATION: FIGURE 1                                                | 5 |
| C. DEMING AND PASSING BABLOK REGRESSION: FIGURE 2                                            | 7 |
| D. AGREEMENT PLOT                                                                            | 8 |
| D.1 Agreement plot (default Bland-Altman method): FIGURE 3 . . . . .                         | 8 |
| D.2 Adjusted agreement plot allowing differential and proportional bias : FIGURE 4 . . . . . | 9 |

## libraries required

```
library(tidyverse)
library(blandr)
library(ggpubr)
library(ggExtra)
library(datapasta) # reprex used for creating and pasting the dataset
library(MethodCompare) # Bland-Altman with proportional bias
library(mcr) # passing bablok et deming regression
```

This is the supplementary file from the article :Reliability associated with measurement of continuous variables in veterinary medicine: what tell the different possible indicators and how to use and report them properly?.

## A. DATASET USED FOR ILLUSTRATION PURPOSE: FEEDLOT LUNG CONSOLIDATION DEPTH BY 2 RATERS

The data used are a subset of data reported in a recent paper reporting reliability of raters assessing lung consolidation depth in scoring the same 50 videoloops of feedlot calves See **Buczinski et al., Inter-rater agreement and reliability of thoracic ultrasonographic findings in feedlot calves, with or without naturally occurring bronchopneumonia. J Vet. Intern. Med. 2018 Sep;32(5):1787-1792. doi: 10.1111/jvim.15257.** The dataset is online. For illustration purpose I have used the table between rater 1 (*Depth\_1*) and rater 2 (*Depth\_1*) assessing lung consolidation depth in cm. A total of 50 rows and 2 columns are obtained in a `rel` table with `Rater_1`, and `Rater_2` variables respectively.

```
rel <- tibble::tribble(
  ~Rater_1, ~Rater_2,
    7,      0,
    0,      0,
    0.5,    0.5,
    3,      3,
    5,      4,
    7,      6.5,
    6,      5,
    2,      0,
    3,      3,
    0,      0,
    3,      3,
    3,      2,
    6,      4,
    0,      0,
    6,      3,
    2,      0,
    0,      0,
    0,      0,
    4,      4.5,
    1,      1,
    0,      0,
    3,      3,
    0,      0,
    2,      2,
    4,      3,
    0,      0,
    4,      3,
    4,      4.5,
    0,      0,
    0,      0,
    3,      2,
    2,      2,
    4,      4,
    0,      0,
    0,      0,
```

```

0,      0,
0,      0.5,
3,      2,
0,      0,
0.5,    0.5,
0,      0,
3,      3,
0,      0,
1,      0.5,
0,      0,
0,      0,
3,      3,
3,      3,
2,      1.5,
0,      0
)

# I'll add for illustration purpose an error term (mean 0, sd=0.2) to avoid overlaying of dots with 0,0
set.seed(1234) # reproducibility seed
A=abs(rnorm(nrow(rel),mean=0,sd=.2))
rel$Rater_1=rel$Rater_1+A
set.seed(12345) # reproducibility seed
B=abs(rnorm(nrow(rel),mean=0,sd=.2))
rel$Rater_2=rel$Rater_2+B

```

*We can look at the data at glance*

```
# Save the scatter plot in a variable
p <- ggplot(rel, aes(x = Rater_1, y = Rater_2)) +
  geom_point(color="black")+theme_classic()+
  labs(x="Operator_1", y="Operator_2")
# Plot the scatter plot with marginal histograms
ggMarginal(p, type = "histogram", fill="red",alpha=0.4)
```

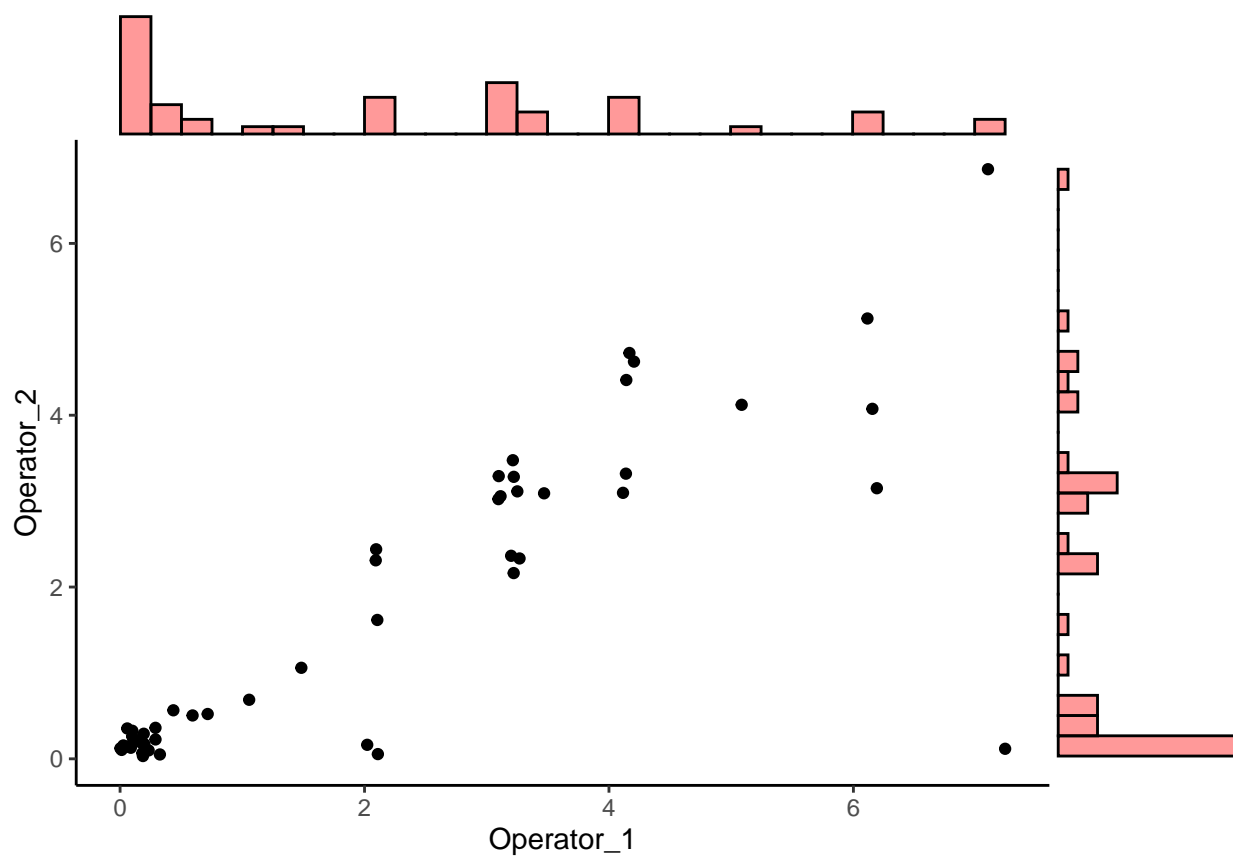

## B. PEARSON AND SPEARMAN CORRELATION: FIGURE 1

The Figure 1 is plotting the scatter plot, linear regression line and value of Pearson values.

```
#####Figure 1 here...#####
#remove # SIGN in the next 2 lines to obtain the fig 1
#tiff("Fig_1.tiff", units="in", width=5, height=5, res=300)
ggplot(rel, aes(x=Rater_1, y=Rater_2))+geom_point()+
  geom_smooth(method="lm", se=FALSE, color="red", alpha=0.2)+
  stat_cor(label.y = 4, r.digits=3, color="red")+
  labs(x="Operator 1 (cm)", y="Operator 2 (cm)")+
  # annotate("text", x=1, y=6, color="black", label= expression(" ~rho ~ "=0.773, p<0.001"))+
  geom_abline(slope=1, intercept=0, color="blue", linetype="dashed", size=1)+
  annotate("text", x=5, y=6.2, color="blue", label= "Perfect fidelity y=x")+
  theme_classic()
```

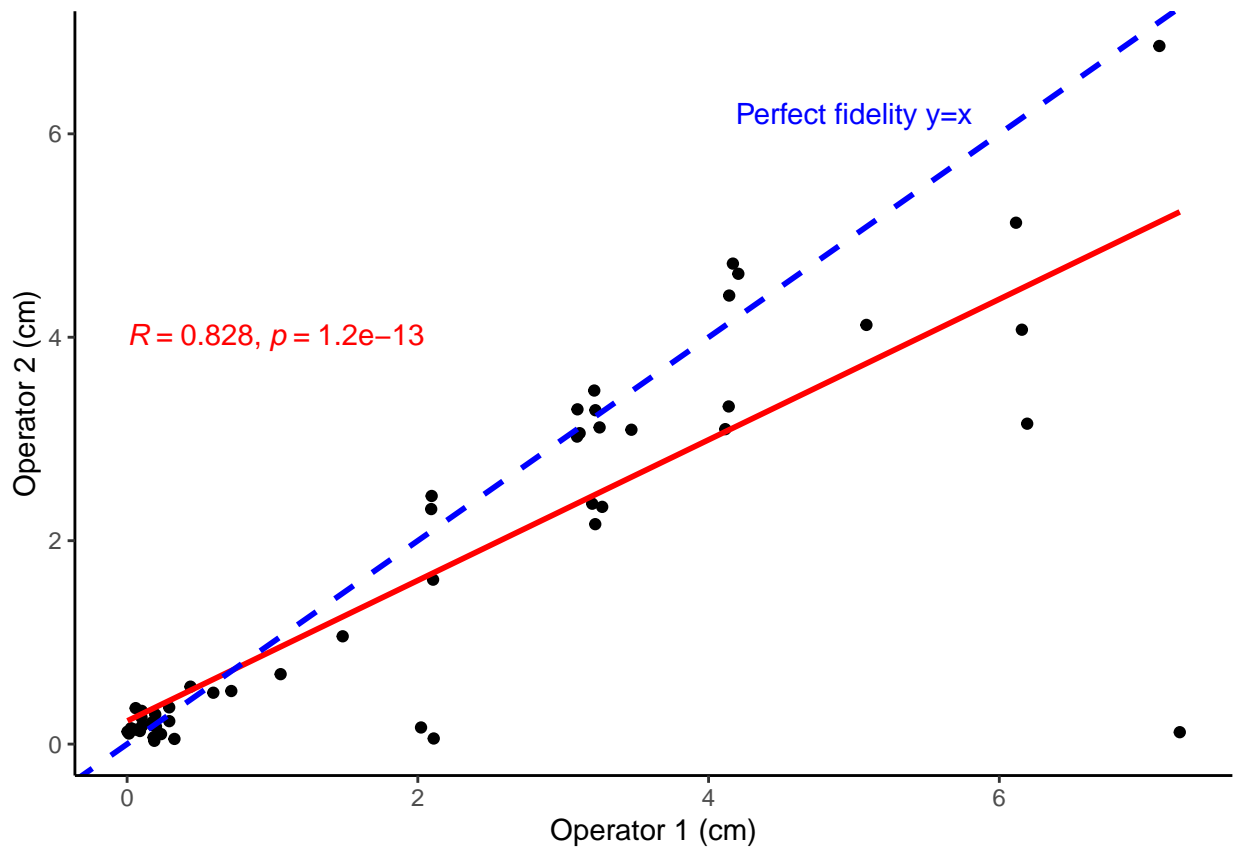

```
#dev.off()
```

The Spearman rho can be calculated simply by the following formula:

```
cor.test(x=rel$Rater_1, y=rel$Rater_2, method = 'spearman')
```

```
##
```

```
## Spearman's rank correlation rho
```

```
##
## data:  rel$Rater_1 and rel$Rater_2
## S = 4720, p-value < 2.2e-16
## alternative hypothesis: true rho is not equal to 0
## sample estimates:
##      rho
## 0.7733493
```

**The Spearman rho is 0.773.**

We can also calculate the Lin's Concordance Correlation Coefficient (CCC) using the `CCC()` function of the `DescTools` package.

```
library(DescTools)
a <- CCC(rel$Rater_1, rel$Rater_2)
a$rho.c$est
```

```
## [1] 0.79404
```

The CCC value is 0.79404.

## C. DEMING AND PASSING BABLOK REGRESSION: FIGURE 2

```
#####Figure 2 here...#####
#remove # SIGN in the next 2 lines to obtain the fig 2
ex<- mcreg(rel$Rater_1, rel$Rater_2, method.reg = "PaBa") #obtaining Passing-Bablok regression
ex2<- mcreg(rel$Rater_1, rel$Rater_2, method.reg= "Deming") #obtaining Deming regression
ex3<- mcreg(rel$Rater_1, rel$Rater_2, method.reg= "WDeming")#obtaining Weighted Deming regression

## The global.sigma is calculated with Linnet's method

lin.reg <- lm(rel$Rater_2~rel$Rater_1) # obtaining linear regression
#tiff("Fig_2.tif", , width = 6, height = 6, units = 'in', res = 300)
plot(rel$Rater_1, rel$Rater_2, main = "", xlab = "Operator 1 (cm)", ylab = "Operator 2 (cm)", pch=16)
abline(ex@para[1:2], col = "black", lty=2)
abline(ex2@para[1:2], col = "black", lty=3)
abline(ex3@para[1:2], col = "black", lty=6)
abline(lin.reg, col="black", lty=1)
legend("topleft", c("Passing-Bablok", "Deming", "Weighted Deming", "Linear regression"), lty=c(2,3,6,1))
```

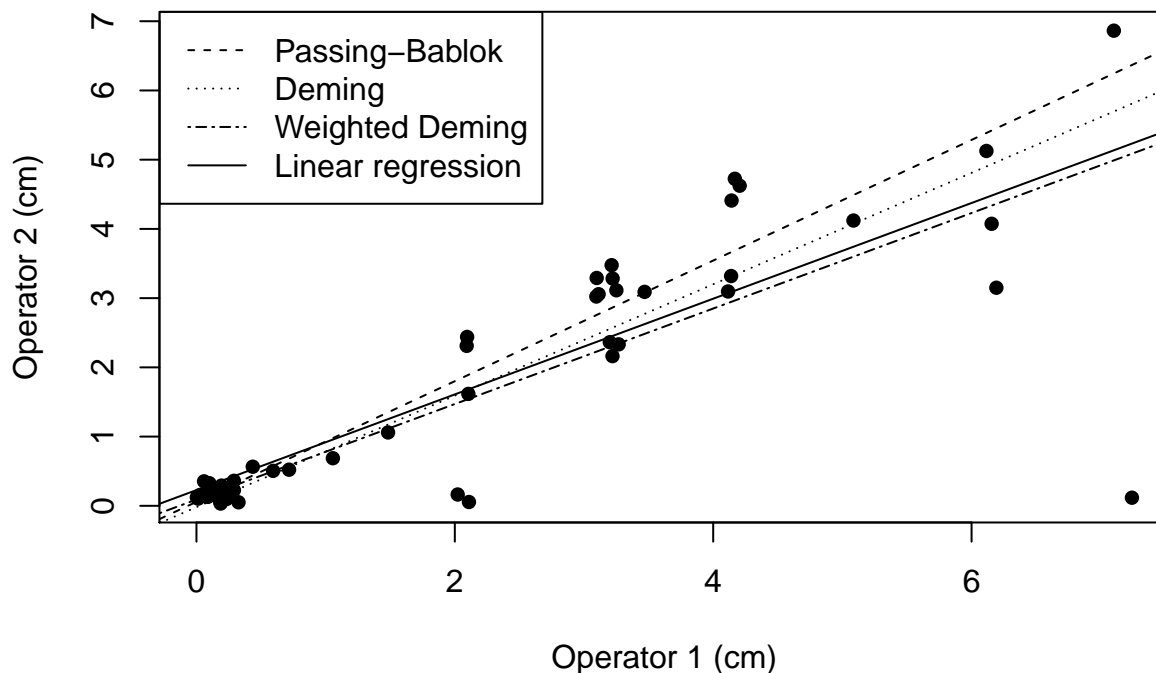

```
#dev.off()
```

## D. AGREEMENT PLOT

### D.1 Agreement plot (default Bland-Altman method): FIGURE 3

```
#####Figure 3 here...#####
#remove # SIGN in the next 2 lines to obtain the fig 3

#pdf("Fig_3.pdf")
#tiff("Fig_3.tif", , width = 5, height = 4, units = 'in', res = 300)
blandr.draw(rel$Rater_1, rel$Rater_2)+theme_bw()+
  annotate("text", x=5.5, y=2.5, color="red", size=3, label= "Upper limit of agreement") +
  annotate("text", x=5.5, y=0.3,color="black",size=3, fontface = "bold", label= "Mean bias") +
  annotate("text", x=5.5, y=-2.3, color="red",size=3, label= "Lower limit of agreement")+
  ggtitle("")+
  ylab(expression(M[m1]-M[m2]))+
  xlab(expression((M[m1]+M[m2])/2))+
  theme_classic()
```

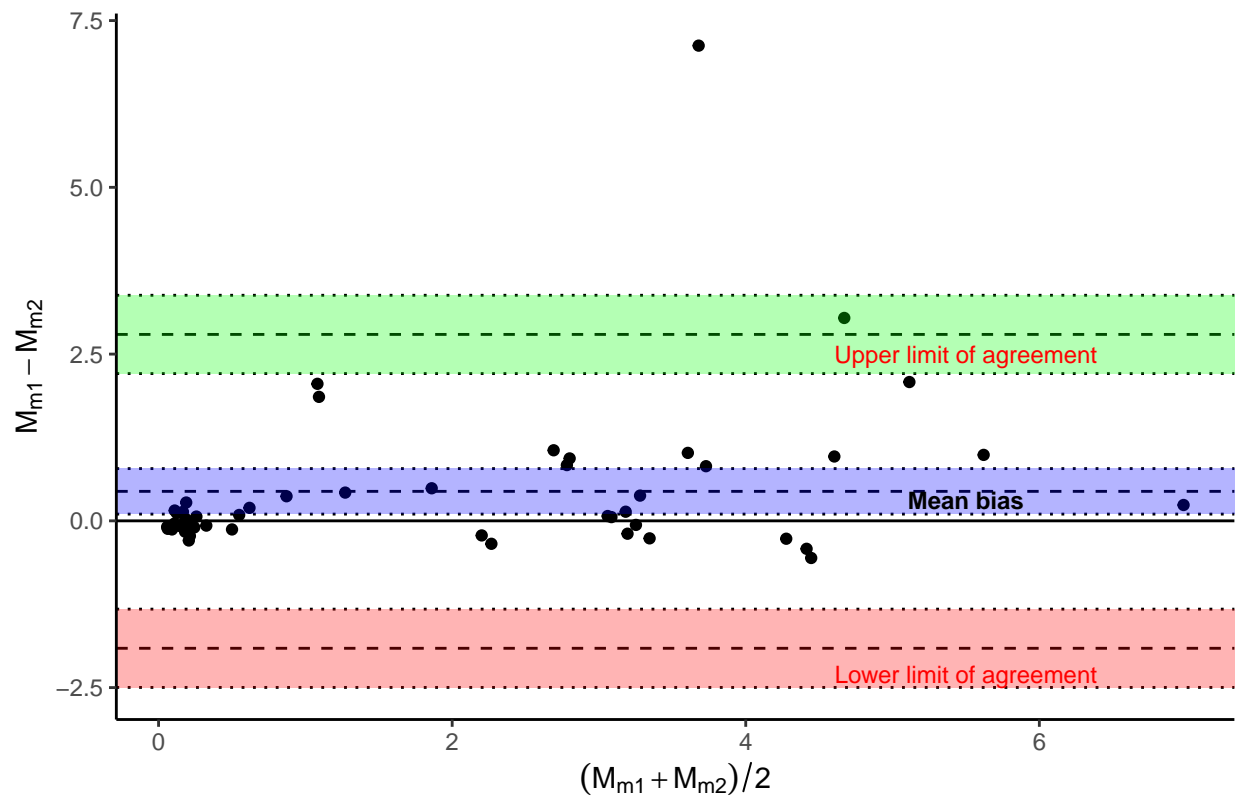



```
#dev.off()
```

## D.2 Adjusted agreement plot allowing differential and proportional bias : FIGURE 4

```
#####Figure 4 here...#####  
#remove # SIGN in the next 2 lines to obtain the fig 4  
rel$id <- c(1:50) #adding row id to identify the subject measured  
rel$y2=rel$Rater_1  
rel$y1=rel$Rater_2  
#pdf("Fig_4.pdf")  
bland_altman_plot(rel, new="y2",Ref="y1", ID="id", fill=TRUE)
```

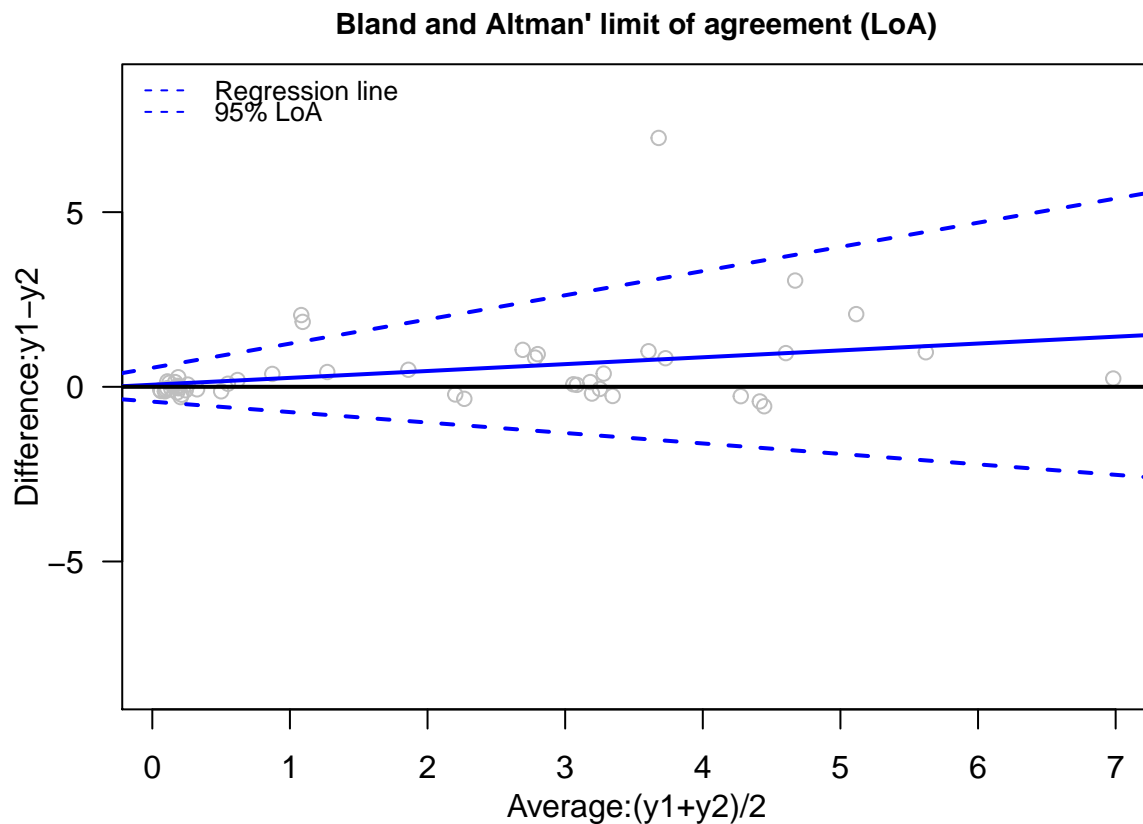

```
#dev.off()
```

ANY QUESTION=> [s.buczinski@umontreal.ca](mailto:s.buczinski@umontreal.ca)
